# Supplementary material for: The Impact of the COVID Pandemic on the Incidence of Presentations with Cancer-Related Symptoms in Primary Care
Source: MDPI journal article supplement (doi:10.3390/cancers14215353), 2022-10-30
Supplement: s1 [file s1]

## Supplementary files

| <b>Cancer-related symptoms</b>                                                                                                                                                                                                                                                                                                             | <b>History of cancer</b>                                                                                                                                                                                                                                                                                                                                                                                                                                            | <b>Cardiovascular Disease</b>                                                                                                                                                                                                                                                                                                                                                                                                                                                                               | <b>Psychiatric / Psychological</b>                                                                                                                                                                                                                                                                                                                                                                                                                                                                                      |
|--------------------------------------------------------------------------------------------------------------------------------------------------------------------------------------------------------------------------------------------------------------------------------------------------------------------------------------------|---------------------------------------------------------------------------------------------------------------------------------------------------------------------------------------------------------------------------------------------------------------------------------------------------------------------------------------------------------------------------------------------------------------------------------------------------------------------|-------------------------------------------------------------------------------------------------------------------------------------------------------------------------------------------------------------------------------------------------------------------------------------------------------------------------------------------------------------------------------------------------------------------------------------------------------------------------------------------------------------|-------------------------------------------------------------------------------------------------------------------------------------------------------------------------------------------------------------------------------------------------------------------------------------------------------------------------------------------------------------------------------------------------------------------------------------------------------------------------------------------------------------------------|
| - A04 – tiredness<br>- B02 – lymphadenopathy<br>- D13 – jaundice<br>- D15 – melaena<br>- D16 – rectal bleeding<br>- D18 – change in bowel habits<br><br>- D21 – swallowing problems<br>- D24 – abdominal mass<br>- S82 – naevus<br><br>- T08 – weight loss<br>- U06 – haematuria<br>- X12 – postmenopausal bleeding<br>- X19 – breast lump | - S77.03 – melanoma<br>- X76 – breast cancer<br>- D75 – colorectal cancer<br>- R84 – lung cancer<br>- A79 – cancer unknown primary<br>- B74 – haematological cancer<br><br>- D74 – stomach cancer<br>- D76 – pancreatic cancer<br>- D77 – Upper-gastrointestinal cancer<br>- L71 – nervous system cancer<br>- R85 – respiratory cancer<br>- T71/73 – endocrine cancer<br><br>- U75/76/77 – urinary cancer<br>- Y77 – prostate cancer<br>- Y78 – male genital cancer | - K71 – rheumatic heart disease<br>- K74 – angina pectoris<br>- K75 – myocardial infarction<br>- K76 – ischaemic heart disease<br>- K77 – heart failure<br>- K83 – cardiac valve disease<br><br>- K84 – other heart disease<br>- K85/86/87 – hypertension<br>- K89 – transient cerebral ischaemic<br>- K90 – stroke<br>- K91 – atherosclerosis<br>- K92.01 – claudication<br><br>- K93 – lung emboli<br>- K94 – thrombophlebitis<br>- K99 – cardiovascular disease other<br>- W77.03 – deep vein thrombosis | - P01 - anxiety<br>- P02 – acute stress reaction<br>- P03 – depressed<br>- P15 – chronic alcohol misuse<br>- P19 – drug misuse<br>- P29 – other psychiatric symptoms<br>- P70 – dementia<br>- P71 – organic psychosis<br>- P72 – schizophrenia<br><br>- P73 – affective psychosis<br>- P74 – anxiety disorder<br>- P76 – depression<br><br>- P77 – suicide attempt<br>- P78 - neurasthenia<br>- P79 – phobia / compulsion<br><br>- P80 – personality disorder<br>- P85 – mental handicap<br><br>- P98 – other psychosis |
| <b>Diabetes</b>                                                                                                                                                                                                                                                                                                                            | <b>Chronic Obstructive Airways Disease (COPD)</b>                                                                                                                                                                                                                                                                                                                                                                                                                   |                                                                                                                                                                                                                                                                                                                                                                                                                                                                                                             |                                                                                                                                                                                                                                                                                                                                                                                                                                                                                                                         |
| T90 – diabetes mellitus                                                                                                                                                                                                                                                                                                                    | - R95 - COPD                                                                                                                                                                                                                                                                                                                                                                                                                                                        |                                                                                                                                                                                                                                                                                                                                                                                                                                                                                                             |                                                                                                                                                                                                                                                                                                                                                                                                                                                                                                                         |

**Supplementary Table S1: ICPC codes**

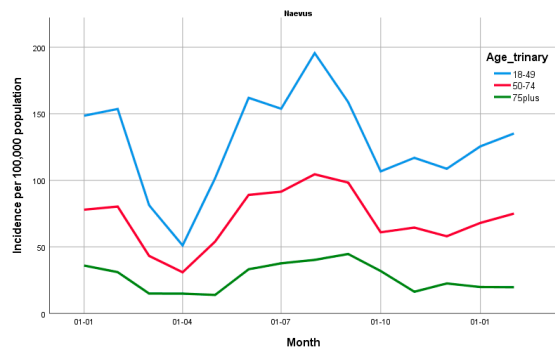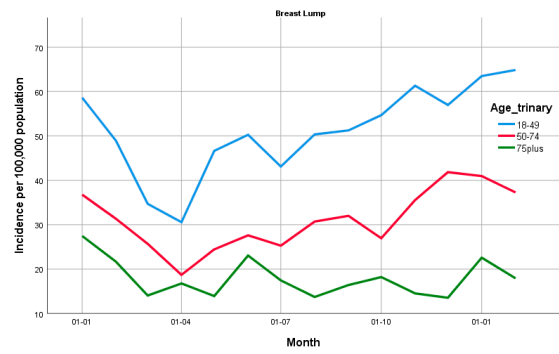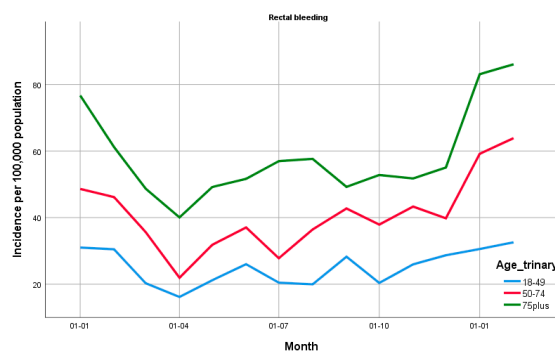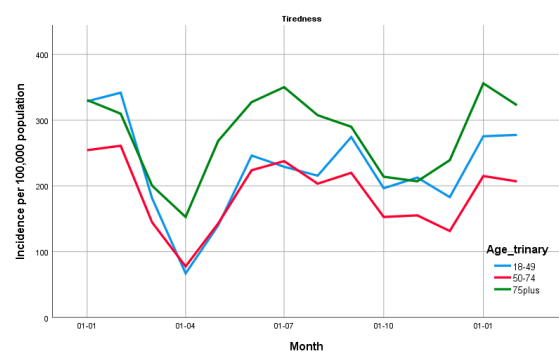

**Supplementary Figure S1: Incidence according to age**

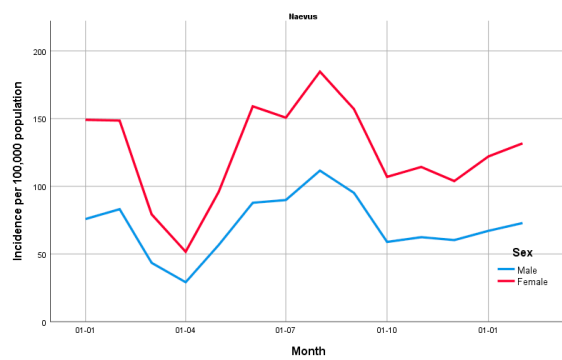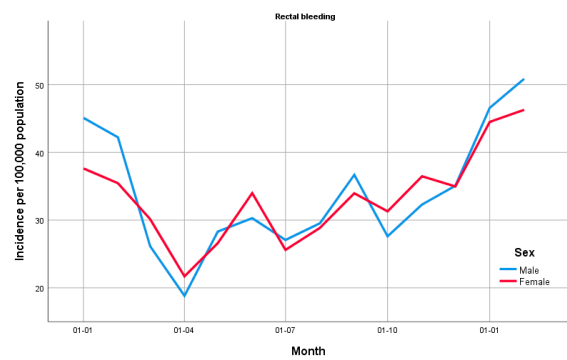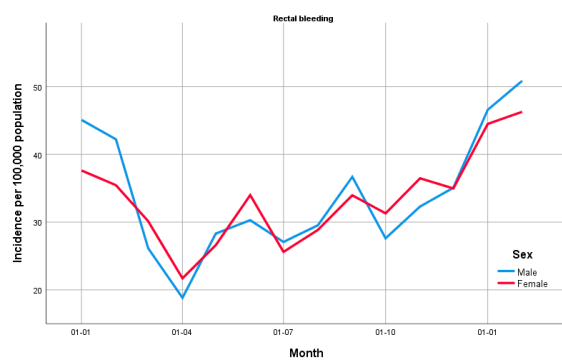

**Supplementary Figure S2: Incidence according to sex**

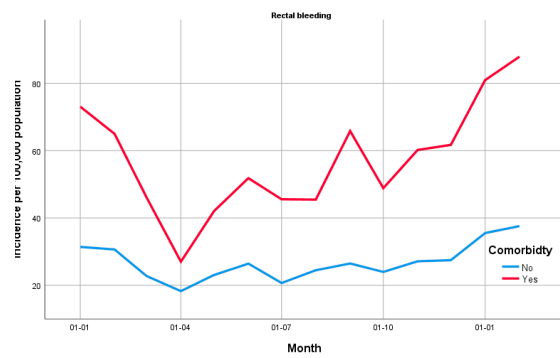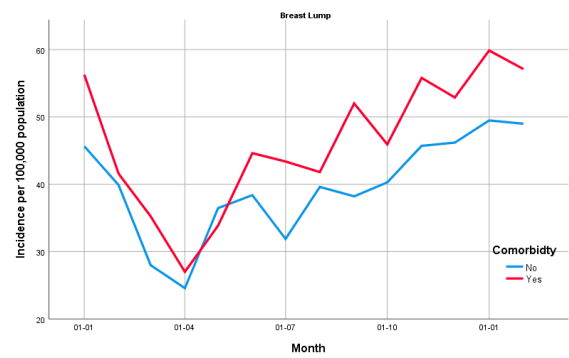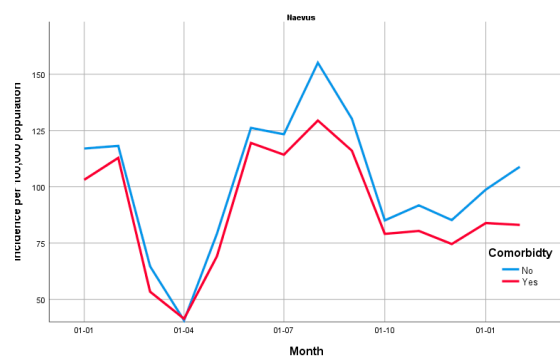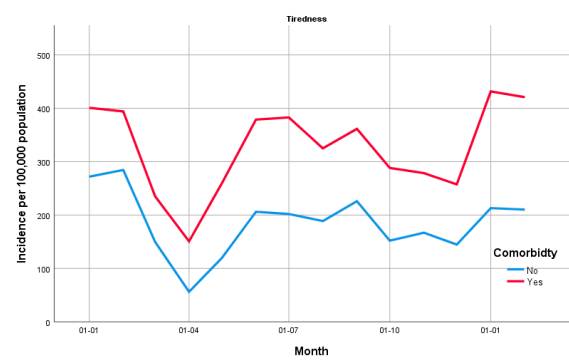

**Supplementary Figure S3:** Incidence according to major comorbidity status (defined as cardiovascular, diabetes, or chronic obstructive airways disease, and psychiatric or psychological diagnosis at any timepoint, coded through ICPC codes described in supplementary file, Table S1).

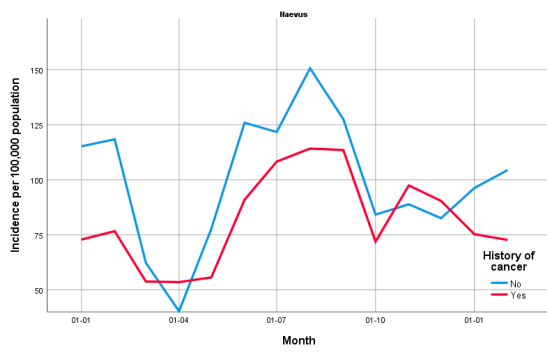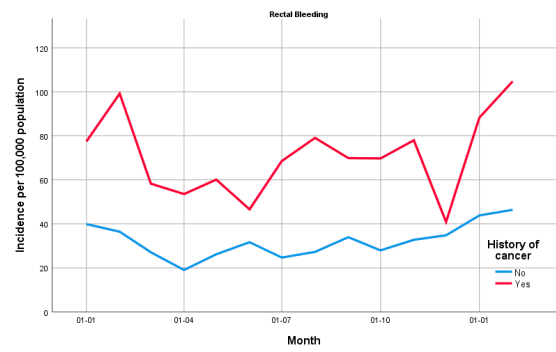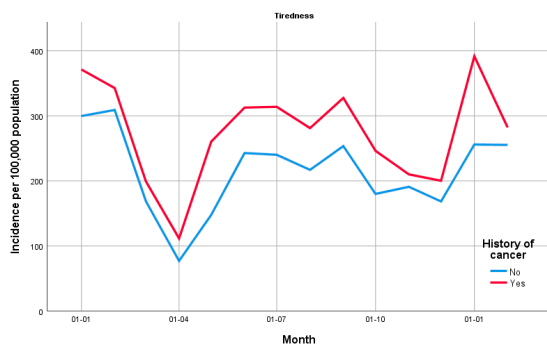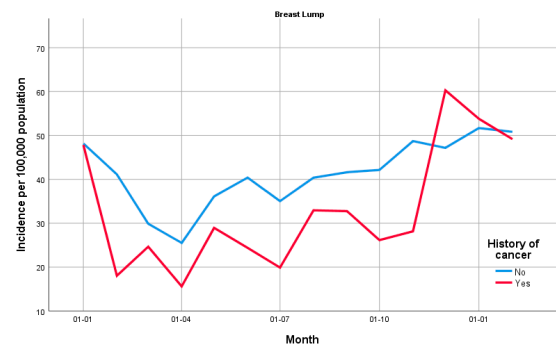

**Supplementary Figure S4: Incidence according to history of cancer**
